# Supplementary material for: Senescent-like macrophages mediate angiogenesis for endplate sclerosis via IL-10 secretion in male mice
Source: PubMed Central journal article supplement (PMC10997778; doi:10.1038/s41467-024-47317-1), 2024-04-05
Supplement: 41467_2024_47317_MOESM1_ESM.pdf [file 41467_2024_47317_MOESM1_ESM.pdf]

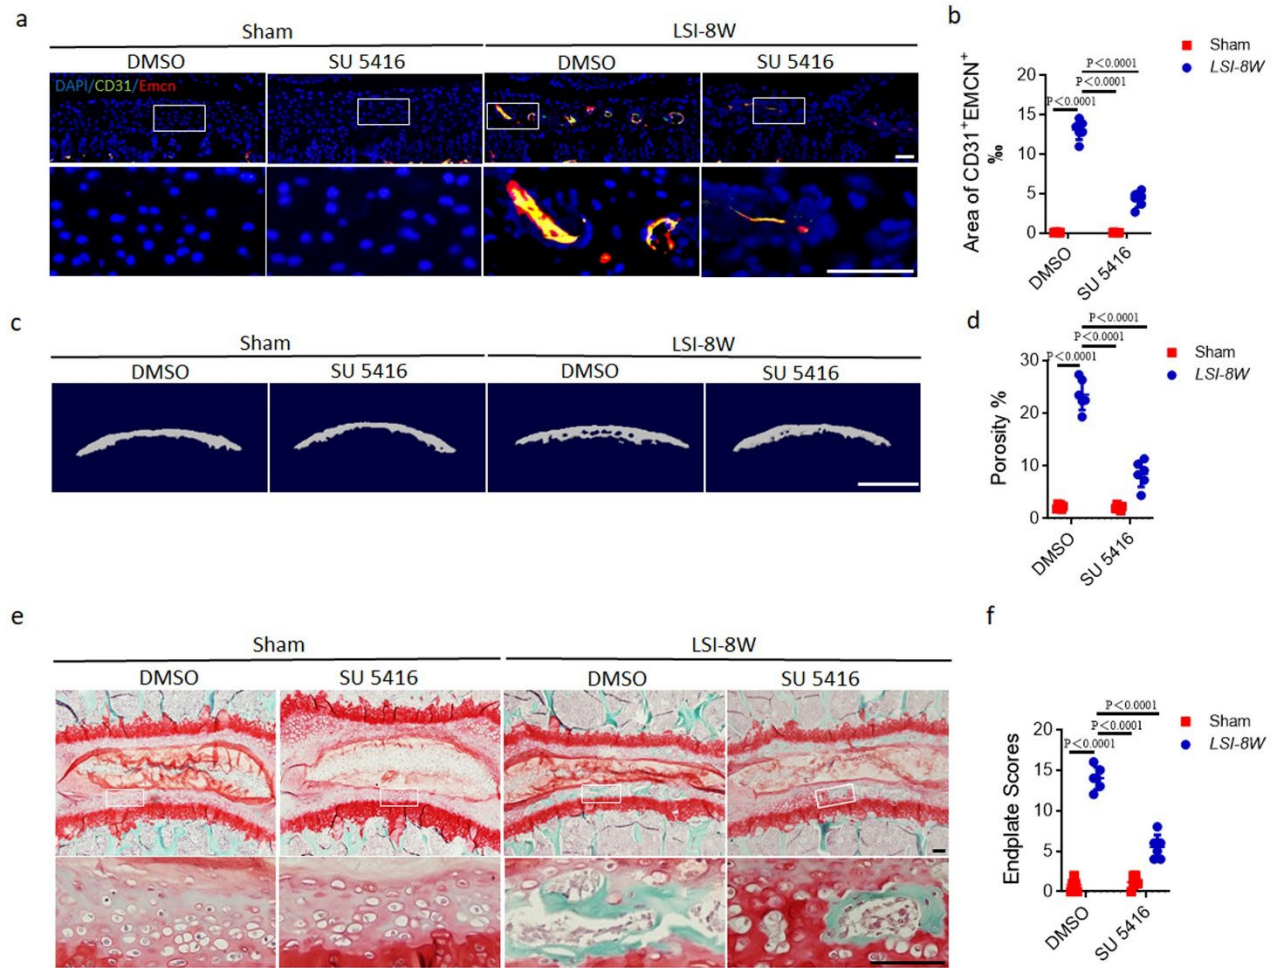

**Supplementary Figure 1 VEGFR inhibitor blocks the angiogenesis and sclerosis of endplates**

(a) Representative immunofluorescent images of CD31<sup>+</sup> (green), Emcn<sup>+</sup> (red) cells, and DAPI (blue) staining of the endplates at 8 weeks after LSI surgery or sham surgery. Scale bars, 50  $\mu$ m.

(b) Percentage of CD31<sup>+</sup>Emcn<sup>+</sup> area of (a). (c) Representative three-dimensional  $\mu$ CT images of the endplates (coronal view) at 8 weeks after LSI surgery or sham surgery. Scale bars, 500  $\mu$ m.

(d) Quantitative analysis of the total porosity of (c). (e) Representative images of safranin O and fast green staining at 8 weeks after LSI or sham surgery, proteoglycan (red), and cavities (green). Scale bars, 50  $\mu$ m.

(f) Endplate scores of (e). n = 6 per group. Data are represented as means  $\pm$  standard deviations, as determined by One-way ANOVA. Source data are provided as a Source Data file.

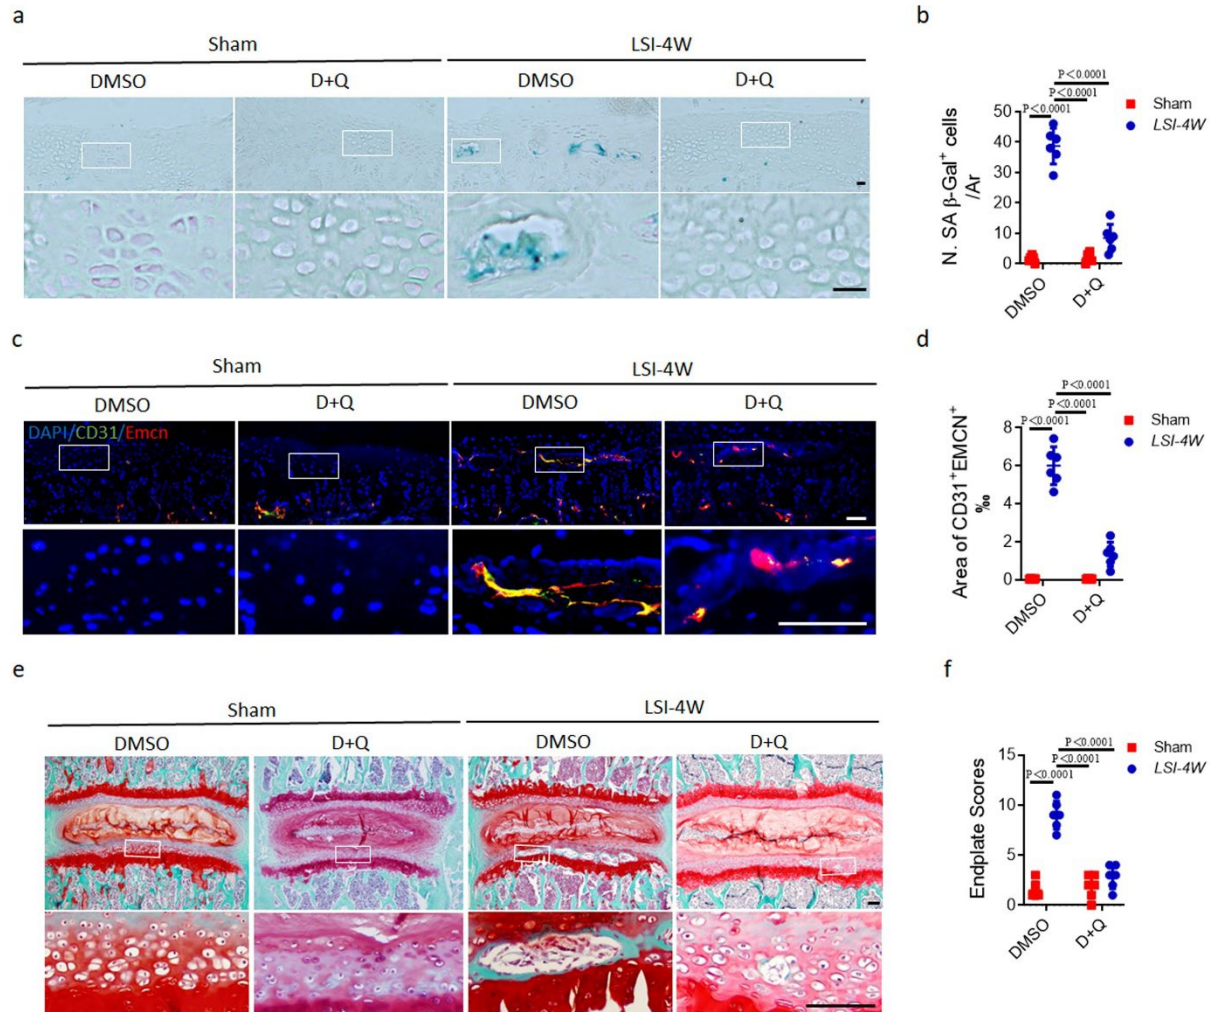

## Supplementary Figure 2 The sclerosis of endplates is delayed by D+Q treatment in mice at 4 weeks after LSI surgery

(a) Representative images of coronal mouse caudal endplate sections of L4/5 stained for SA-βGal (green). Scale bars, 50 μm. (b) Quantitative analysis of (a). (c) Representative immunofluorescent images of CD31 (green), Emcn (red) staining, and DAPI (blue) staining of nuclei. Scale bars, 50 μm. (d) Percentage of CD31<sup>+</sup>Emcn<sup>+</sup> area in the endplates of (c). (e) Representative images of safranin O and fast green staining, proteoglycan (red), and cavities (green). Scale bars, 50 μm. (f) Endplate scores as an indication of endplate degeneration based on safranin O and fast green staining. n = 6 per group. Data are represented as means ± standard deviations, as determined by One-way ANOVA. Source data are provided as a Source Data file.

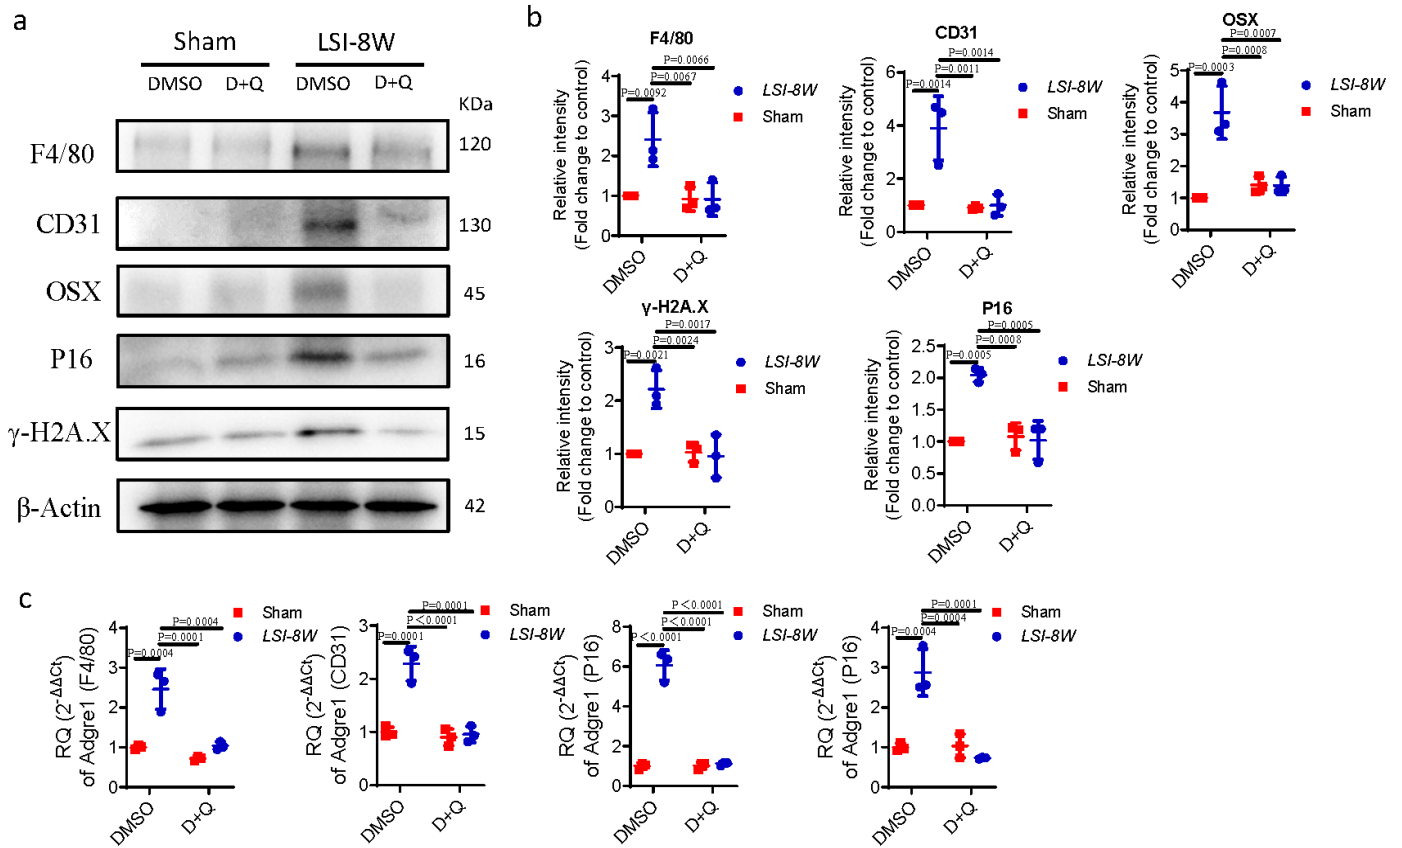

**Supplementary Figure 3** (a) Western blots of F4/80, CD31, OSX, P16, and  $\gamma$ -H2A.X in the endplates at 8 weeks after LSI surgery with DMSO or D+Q treatment. (b) Quantitative analysis of (a). (c) QRT-PCR analysis of F4/80, CD31, OSX, and P16 in the endplates at 8 weeks after LSI surgery with DMSO or D+Q treatment.  $n = 3$  per group. Data are represented as means  $\pm$  standard deviations, as determined by One-way ANOVA. Source data are provided as a Source Data file.

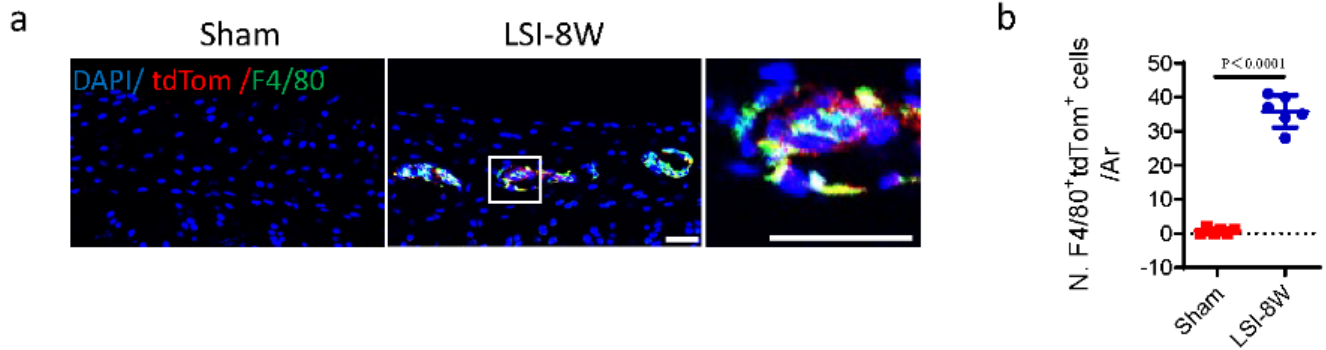

**Supplementary Figure 4 The number of tdTom<sup>+</sup>F4/80<sup>+</sup> cells increases in the endplates at 8 weeks after LSI surgery.** (a) Representative immunofluorescent images of tdTom<sup>+</sup> (red), F4/80<sup>+</sup> (green) staining, and DAPI (blue) staining of nuclei. Scale bars, 50  $\mu$ m. (b) Quantitative analysis of the number of F4/80<sup>+</sup>tdTom<sup>+</sup> cells in the endplates of (a). n = 6 per group. Data are represented as means  $\pm$  standard deviations, as determined by two-tailed Student's t-test. Source data are provided as a Source Data file.

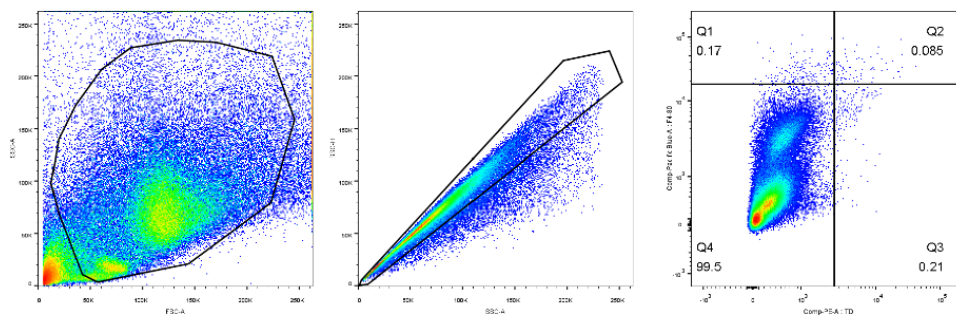

**Supplementary Figure 5** The gating strategy for the flow cytometry analysis.

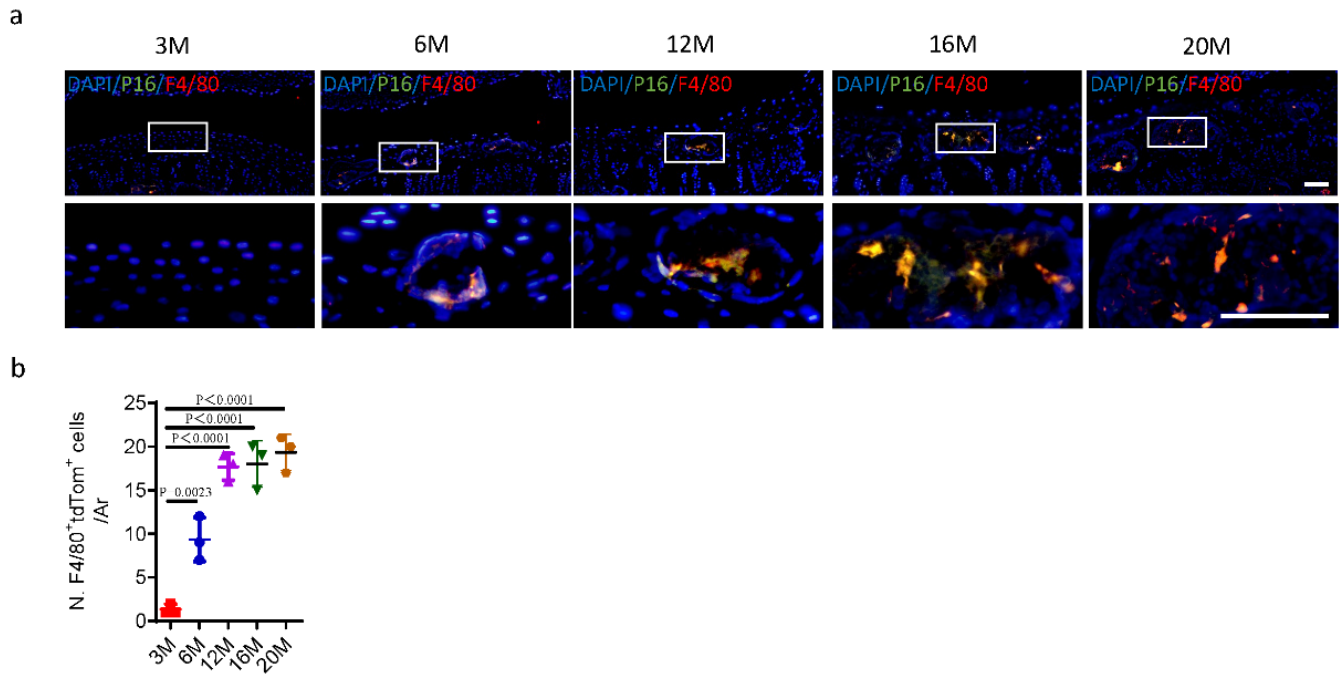

**Supplementary Figure 6 Macrophages are already senescent upon infiltration into the endplates.** (a) Representative co-immunofluorescent images of F4/80<sup>+</sup> (red) with P16<sup>+</sup> (green) staining in the endplates of 3, 6, 12, 16, and 20-month-old mice. (b) Quantitative analysis of (a). Scale bars, 50  $\mu$ m. n = 3 per group. Data are represented as means  $\pm$  standard deviations, as determined by One-way ANOVA. Source data are provided as a Source Data file.

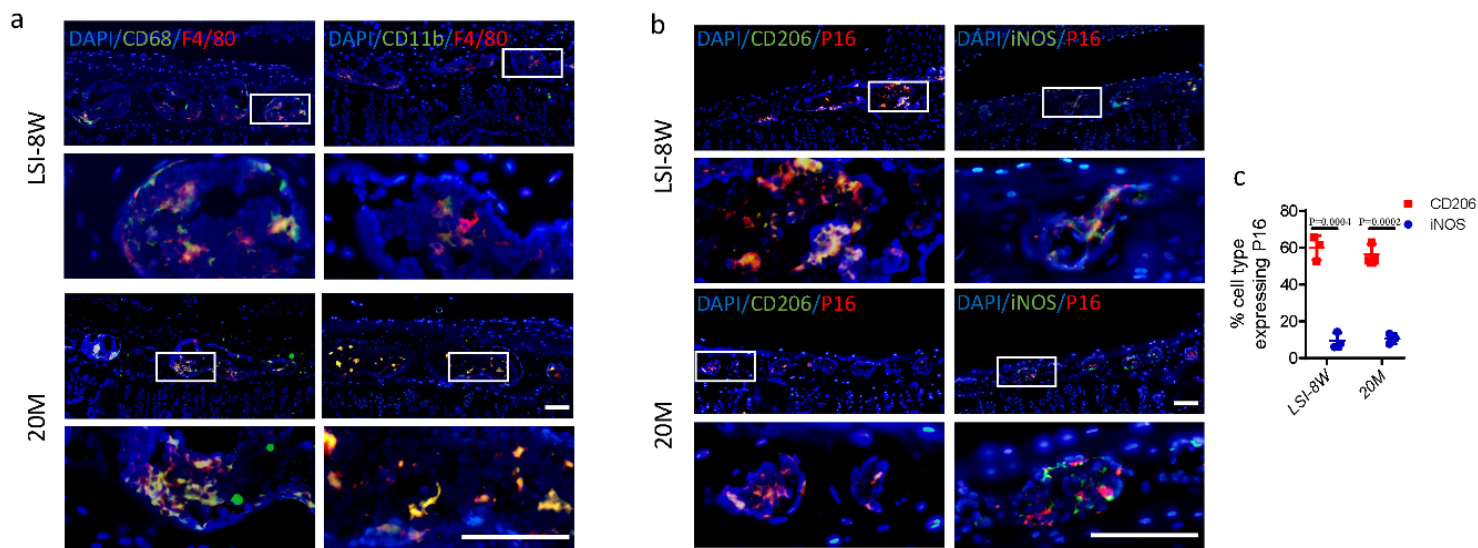

**Supplementary Figure 7 Senescent-like macrophages express more M2 marker in the endplates of LSI surgery mice and aged mice.** (a) Representative co-immunofluorescent images of F4/80<sup>+</sup> (red) with CD68<sup>+</sup> or CD11b<sup>+</sup> (green) staining in the endplates at 8 weeks after LSI surgery or in 20-month-old mice. (b) Representative co-immunofluorescent images of P16<sup>+</sup> (red) with CD206<sup>+</sup> or iNOS<sup>+</sup> (green) staining in the endplates at 8 weeks after LSI surgery or in 20-month-old mice. (c) Quantitative analysis of (b). Scale bars, 50  $\mu$ m. n = 3 per group. Data are represented as means  $\pm$  standard deviations, as determined by One-way ANOVA. Source data are provided as a Source Data file.

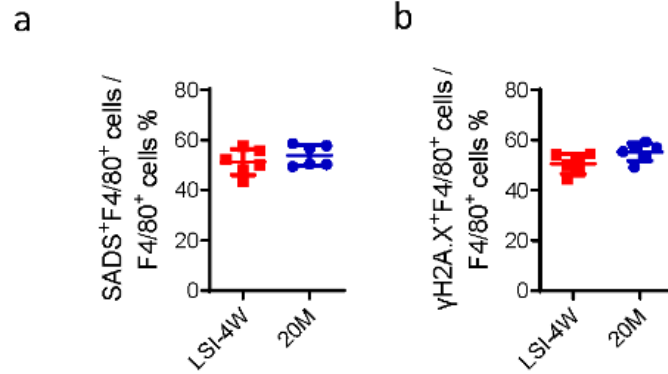

**Supplementary Figure 8** (a,b) The percentage of the SADS<sup>+</sup>/F4/80<sup>+</sup> (a) or  $\gamma$ H2A.X<sup>+</sup>/F4/80<sup>+</sup> (b) double-positive cells over F4/80<sup>+</sup> cells in the endplates at 4 weeks after LSI surgery or in 20-month-old mice. n = 6 per group. Data are represented as means  $\pm$  standard deviations. Source data are provided as a Source Data file.



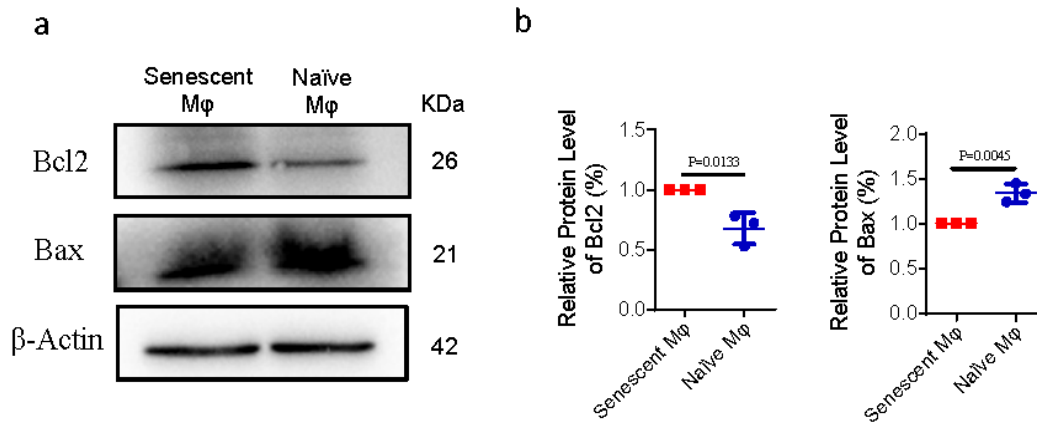

**Supplementary Figure 9 The increased anti-apoptotic activity in senescent bone marrow-derived macrophages.** (a) Western blots of the Bcl2 and Bax in bone marrow-derived macrophages administrated with 100  $\mu$ M H<sub>2</sub>O<sub>2</sub> or PBS for 4 hours. (b) Quantitative analysis of (a). n = 3 per group. Data are represented as means  $\pm$  standard deviations, as determined by two-tailed Student's t-test. Source data are provided as a Source Data file.

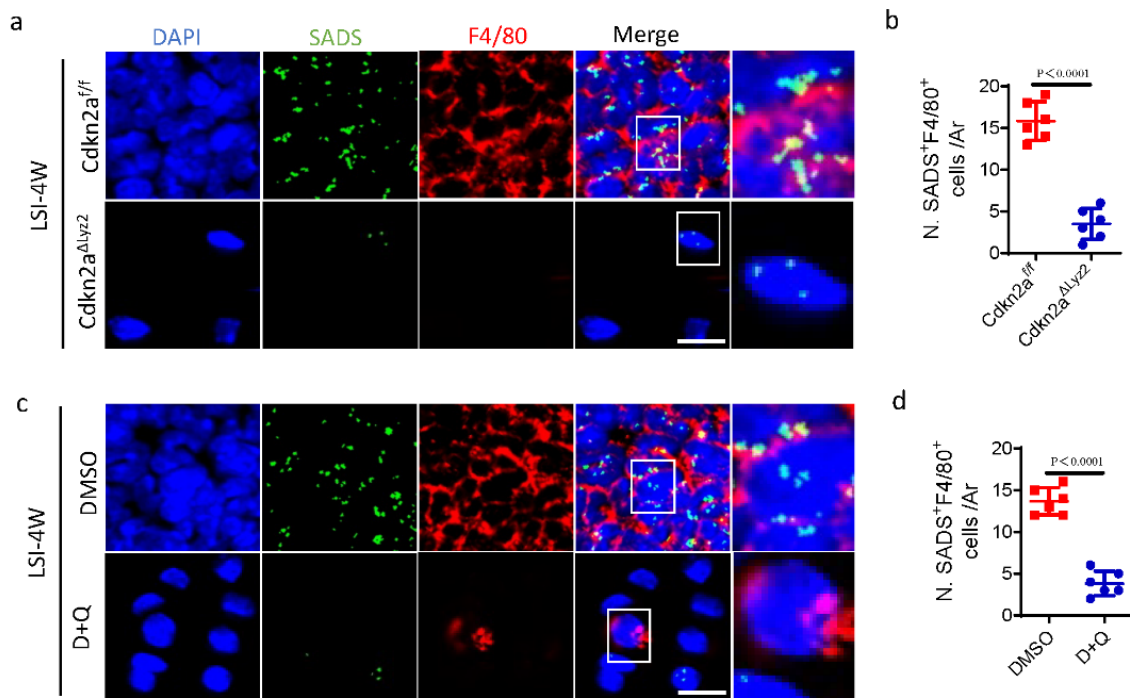

**Supplementary Figure 10** The LSI-induced increase in the number of F4/80<sup>+</sup>SADS<sup>+</sup> cells ( $\geq 4$  SADS/cell) in the endplates is diminished by D+Q treatment or conditional knockout of Cdkn2a in Lyz2<sup>+</sup> cells. (a, c) Representative images of senescence-associated distension of satellites (SADS, green), F4/80 (red), and DAPI (blue) staining of nuclei in the endplates at 4 weeks after LSI surgery by performing simultaneous immunofluorescent staining and immunofluorescent in situ hybridization (FISH). Scale bars, 10  $\mu$ m. (b, d) Quantitative analysis of the number of F4/80<sup>+</sup>SADS<sup>+</sup> cells ( $\geq 4$  SADS/cell) in the endplates of (a, c). n = 6 per group. Data are represented as means  $\pm$  standard deviations, as determined by two-tailed Student's t-test. Source data are provided as a Source Data file.

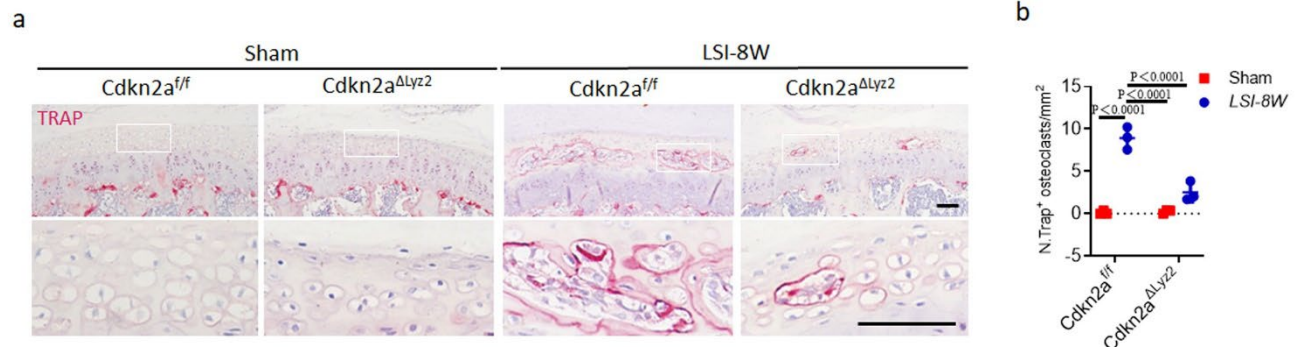

**Supplementary Figure 11 The conditional knockout of *Cdkn2a* decreases the number of osteoclasts in the endplates of LSI mice.** (a) Representative images of tartrate-resistant acid phosphatase (TRAP) (magenta) at 8 weeks after LSI or sham surgery in *Cdkn2a<sup>ΔLyz2</sup>* mice or *Cdkn2a<sup>f/f</sup>* mice. Scale bars, 50  $\mu$ m. (b) Quantitative analysis of the number of TRAP<sup>+</sup> cells in the endplates. n = 3 per group. Data are represented as means  $\pm$  standard deviations, as determined by One-way ANOVA. Source data are provided as a Source Data file.

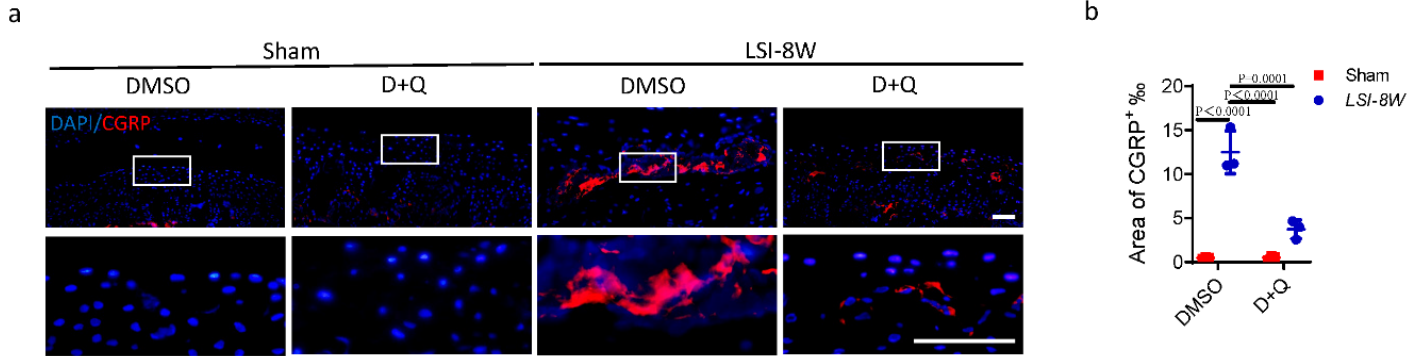

**Supplementary Figure 12 D+Q treatment decreases the density of CGRP<sup>+</sup> sensory nerves in the endplates of LSI surgery mice.** (a) Representative images of immunofluorescent staining of CGRP<sup>+</sup> sensory nerves (red) and DAPI (blue) staining of nuclei in the endplates. Scale bars, 50  $\mu$ m. (b) Percentage of CGRP<sup>+</sup> area in the endplates of (a). n = 3 per group. Data are represented as means  $\pm$  standard deviations, as determined by One-way ANOVA. Source data are provided as a Source Data file.

a

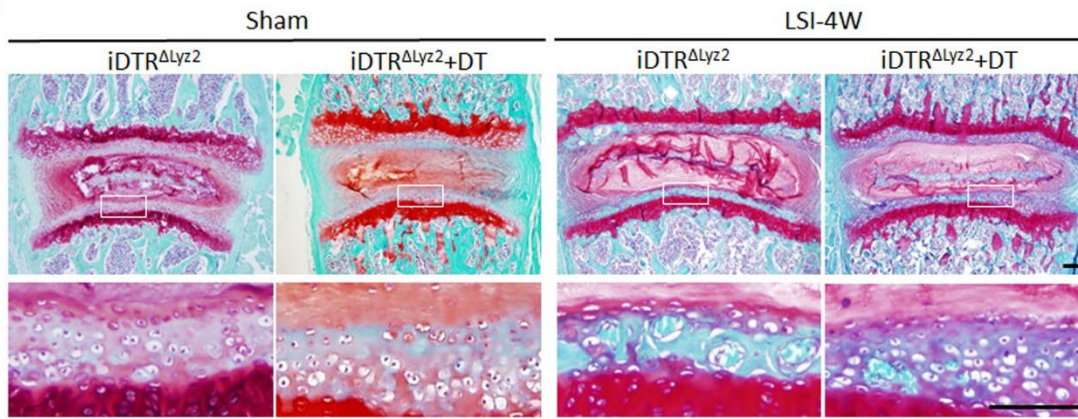

b

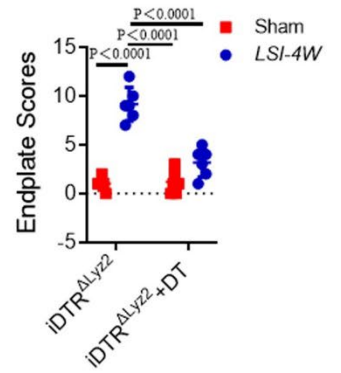

**Supplementary Figure 13 DT injection inhibits LSI-induced endplate morphological degeneration at 4 weeks in iDTR<sup>ΔLyz2</sup> mice** (a) Representative images of safranin O and fast green staining of the endplates. Scale bars, 50  $\mu$ m. (b) Endplate scores of (a). n = 6 per group. Data are represented as means  $\pm$  standard deviations, as determined by One-way ANOVA. Source data are provided as a Source Data file.

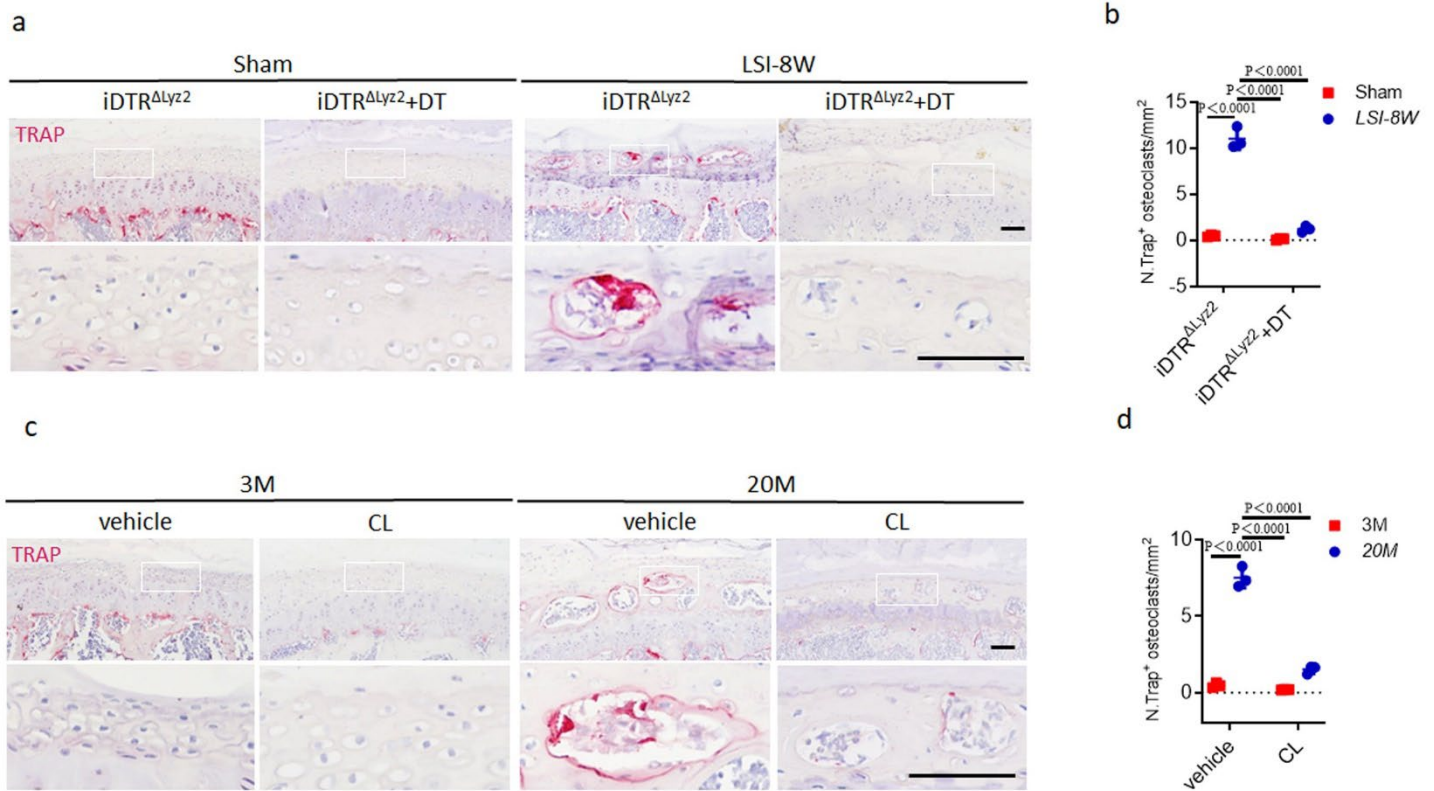

**Supplementary Figure 14 The macrophage deletion decreases the number of osteoclasts in the endplates of LSI mice.** (a) Representative images of tartrate-resistant acid phosphatase (TRAP) (magenta) at 8 weeks after LSI or sham surgery in iDTR<sup>ΔLyz2</sup> mice treated with DT or vehicle. Scale bars, 50  $\mu$ m. (b) Quantitative analysis of the number of TRAP<sup>+</sup> cells in the endplates of (a). (c) Representative images of TRAP (magenta) in 3-month-old mice or 20-month-old mice treated with CL or vehicle. Scale bars, 50  $\mu$ m. (d) Quantitative analysis of the number of TRAP<sup>+</sup> cells in the endplates of (c).  $n = 3$  per group. Data are represented as means  $\pm$  standard deviations, as determined by One-way ANOVA. Source data are provided as a Source Data file.

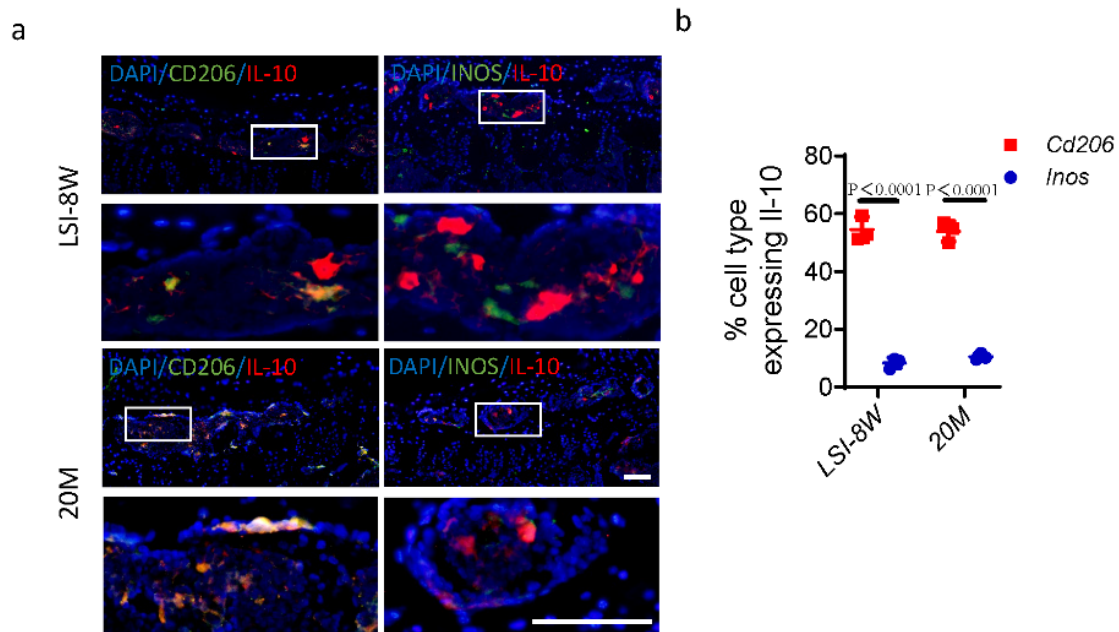

**Supplementary Figure 15** The cells expressing IL-10 mainly co-localized with CD206<sup>+</sup> cells rather than iNOS<sup>+</sup> cells in the endplates of LSI surgery mice or aged mice. (a) Representative co-immunofluorescent images of IL-10<sup>+</sup> (red) with CD206<sup>+</sup> or iNOS<sup>+</sup> (green) staining in the endplates at 8 weeks after LSI surgery or in 20-month-old mice. (b) Quantitative analysis of (b). Scale bars, 50  $\mu$ m. n = 3 per group. Data are represented as means  $\pm$  standard deviation, as determined by One-way ANOVA. Source data are provided as a Source Data file.

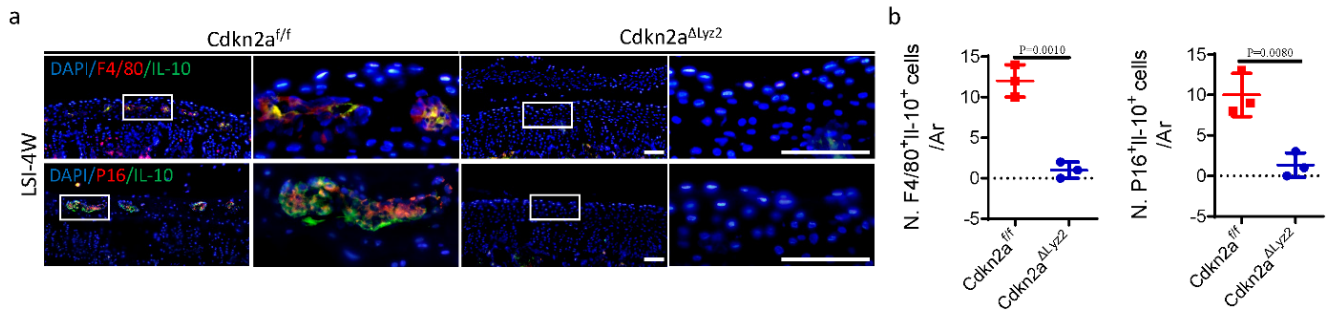

**Supplementary Figure 16 Knockout of *cdkn2a* (p16) in *Lyz2*<sup>+</sup> cells decreases the expression of IL-10** (a) Representative co-immunofluorescent images of IL-10 (green) with F4/80 or P16 (red) in mouse caudal endplates of L4/5 in *Cdkn2a*<sup>ΔLyz2</sup> or *Cdkn2a*<sup>f/f</sup> mice at 4 weeks after LSI surgery. Scale bars, 50 μm. (b) Quantitative analysis of (a). Scale bars, 50 μm. n = 3 per group. Data are represented as means ± standard deviations, as determined by two-tailed Student's t-test. Source data are provided as a Source Data file.



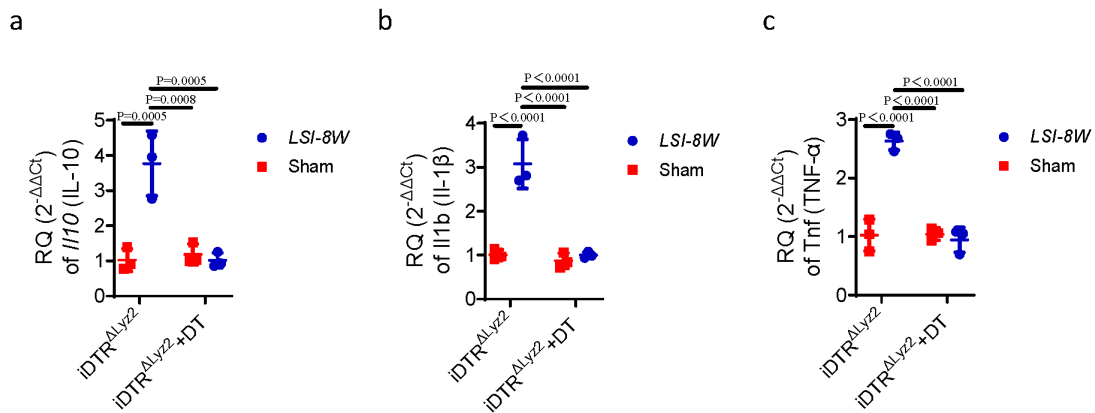

**Supplementary Figure 17** The mRNA expression of Il10 (IL-10) (a), Il1b (IL-1 $\beta$ ) (b), and Tnf (TNF- $\alpha$ ) (c) in the endplates from iDTR $\Delta$ Lyz2 mice at 8 weeks after LSI surgery with or without DT injection, determined by qRT-PCR. n = 3 per group. Data are represented as means  $\pm$  standard deviations, as determined by One-way ANOVA. Source data are provided as a Source Data file.

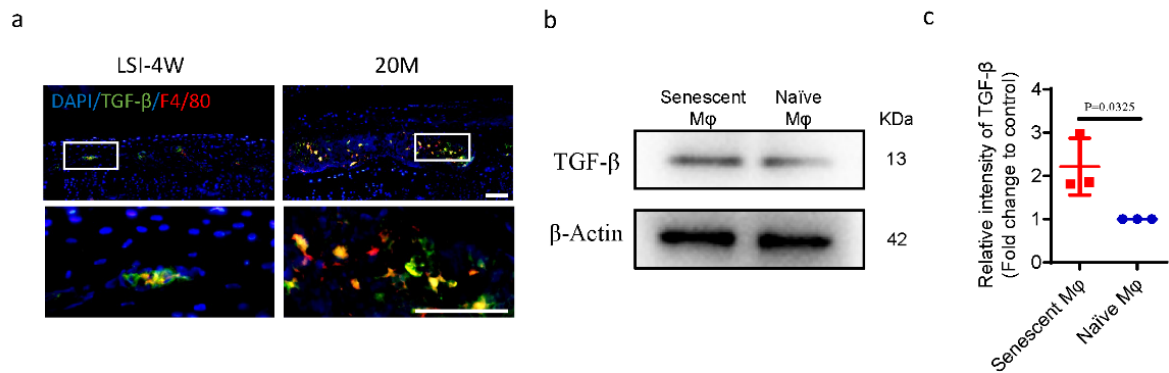

**Supplementary Figure 18 TGF-β is elevated in senescent-like macrophages.** (a) Representative immunofluorescent images of TGF-β (green), F4/80 (red), and DAPI (blue) staining of nuclei in the endplates of LSI surgery mice or aged mice. Scale bars, 50 μm. (b) Western blot of TGF-β in bone marrow-derived macrophages administrated with 100 μM H<sub>2</sub>O<sub>2</sub> or PBS for 4 hours. (c) Quantitative analysis of (b). n = 3 per group. Data are represented as means ± standard deviations, as determined by two-tailed Student's t-test. Source data are provided as a Source Data file.

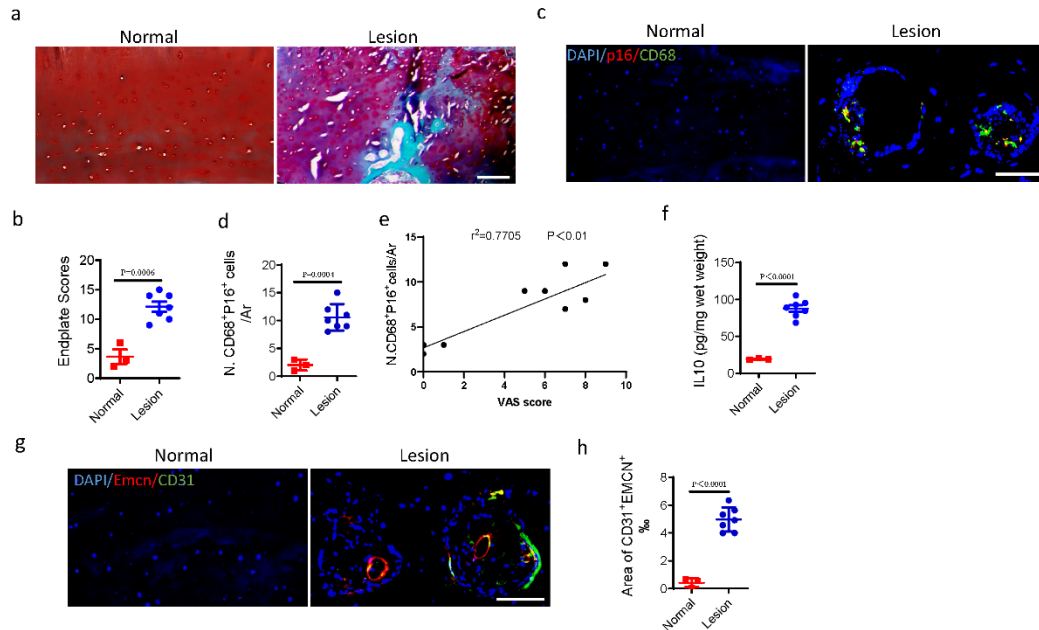

**Supplementary Figure 19 CD68<sup>+</sup>P16<sup>+</sup> cells correlate with the sprouting of CD31<sup>+</sup>Emcn<sup>+</sup> blood vessels in human degenerated endplates**

(a-g) The endplate samples were harvested from patients without or with endplate lesions. (a) Representative images of safranin O and fast green staining of coronal sections. (b) Endplate scores of (a). (c) Representative immunofluorescent images of CD68 (green), P16 (red) staining, and DAPI (blue) staining of nuclei in the coronal sections of the endplates. (d) Quantitative analysis of the number of P16<sup>+</sup>CD68<sup>+</sup> cells of (c). (e) Correlation analysis of the number of CD68<sup>+</sup>P16<sup>+</sup> cells in endplate tissue with Visual Analogue Scale (VAS) score. (f) ELISA analysis of IL-10 concentration in the lysate of the endplates. (g) Representative immunofluorescent images of CD31 (green), Emcn (red) staining, and DAPI (blue) staining of nuclei in the coronal sections. (h) Percentage of CD31<sup>+</sup>Emcn<sup>+</sup> area in the endplates of (g). Scale bars, 50  $\mu$ m. n = 3 for normal endplate group, n=7 for endplate lesions group. Data are represented as means  $\pm$  standard deviations, as determined by two-tailed Student's t-test. Source data are provided as a Source Data file.

### Supplementary Table 1 Information for the human samples

|                             | Normal endplate    | Lesions in endplate         |
|-----------------------------|--------------------|-----------------------------|
| Sample Size                 | 3                  | 7                           |
| Age (Years)                 | 37.3±3.5           | 64.6±5.4                    |
| Sex (Male/Female)           | 2/1                | 5/2                         |
| Body Mass Index (BMI)       | 22.3±1.5           | 23.7±3.1                    |
| Disc Level                  | L4/5 (1)/L5/S1 (2) | L3/4 (1)/L4/5 (2)/L5/S1 (4) |
| Pfirmann grading (G3/G4/G5) | 1/2                | 0/3/4                       |

## Supplementary Table 2 Primers for ChIP (Endothelial cell, pSTAT3)

|                      | predicted sequence       | Forward Primer         | Reverse Primer      |
|----------------------|--------------------------|------------------------|---------------------|
| human-vegfa primer-1 | CAGCCTGAAAA, CAGCTAGGAAT | ATAGCCAGGTCAGAAACCA    | TCCCTAAGTGCTCCCAAA  |
| human-vegfa primer-2 | GAGCCAGGAAA              | ACAAGGAGGAAAAGTTAGTGGC | CAGCAGCAGGGACAAGGT  |
| human-MMP2 primer-1  | TTTCTGAAAAG, CTTTCTGAAAA | TACAGTCAAAGCTGCCCTCT   | TTGCCACAGTCCTCACCA  |
| human-MMP2 primer-2  | TTTTTGGGAAA              | TGTGGCAAACCAAAGTAT     | TCCAGCCTGAACAGCATT  |
| human-MMP2 primer-3  | CTTCCAGGAAG              | CCAGCACTCCACCTCTTT     | GTTGGGAACGCCTGACTT  |
| human-PDGFB primer-1 | CTTCCAGAAAC              | TTTCTTCATGCCTTTCCAC    | CCATCTTGCTCCATAATCC |

### Supplementary Table 3 Primers for qRT-PCR

|              | <b>Forward Primer</b>   | <b>Reverse Primer</b>   |
|--------------|-------------------------|-------------------------|
| Fgf2         | AGAAGAGCGACCCTCACATCA   | CGGTTAGCACACACTCCTTTG   |
| Vegfa        | AGGGCAGAATCATCACGAAGT   | AGGGTCTCGATTGGATGGCA    |
| Mmp2         | TACAGGATCATTGGCTACACACC | GGTCACATCGCTCCAGACT     |
| Mmp9         | TGTACCGCTATGGTTACTCTCG  | GGCAGGGACAGTTGCTTCT     |
| Cdh5         | AAGCGTGAGTCGCAAGAATG    | TCTCCAGGTTTTCGCCAGTG    |
| Hif1a        | GAACGTCGAAAAGAAAAGTCTCG | CCTTATCAAGATGCGAACTCACA |
| Pdgfb        | CTCGATCCGCTCCTTTGATGA   | CGTTGGTGCGGTCTATGAG     |
| Il10         | CCCATTCTCGTCACGATCTC    | TCAGACTGGTTTGGGATAGGTTT |
| Il1b         | TTCAGGCAGGCAGTATCACTC   | CGTCACACACCAGCAGGTTAT   |
| Tnf $\alpha$ | ATGAGCACAGAAAGCATGA     | AGTAGACAGAAGAGCGTGGT    |
| Ccl2         | ATTCTGTGACCATCCCCTCAT   | TGTATGTGCCTCTGAACCCAC   |
| Il18         | CCTACTTCAGCATCCTCTACTGG | AGGGTTTCTTGAGAAGGGGAC   |
| Gapdh        | AATGTGTCCGTCGTGGATCTGA  | AGTGTAGCCCAAGATGCCCTTC  |
| Cdkn2a       | GAGCAGAGGGAGGGAGCAGAAG  | GCCGCCTTCGCTCAGTTTCTC   |
| Pecam1       | TCCAACAGAGCCAGCAGTATGAG | TCCAATGACAACCACCGCAATG  |
| Sp7          | CTCGTCTGACTGCCTGCCTAG   | TTGCCTGGACCTGGTGAGATG   |
| Adgre1       | TTGGCAAGCATCATGGCATACC  | GACGGTTGAGCAGACAGTGAATG |
